# Supplementary material
Source: publisher site journal article supplement (http://www.degruyter.com/publication/journal_key/SPP/downloadAsset/SPP_SPP_2024_CFP_West%20Africa.pdf)
Supplement: Supplementary file 1 [file SPP_SPP_2024_CFP_West%20Africa.pdf]

# CALL FOR PAPERS Statistics, Politics and Policy

**Vol. 2024 No. 3**

## **Special Issue: West Africa**

Five elections are predicted to come up in West Africa in 2024: In Cape Verde, Ghana, and Senegal people will vote, whereas elections in Mali and Burkina Faso are less securely set. With the exception of Cape Verde, all of those are presidential elections on the national level, in Cape Verde, elections are on the local level. Meanwhile, the region was battered by one coup d'Etat after another in the past years. Taking into account only the past four years, Niger, Guinea, Burkina Faso and Mali suffered military changes of their political systems. At the same time, looking at the state of their democracy and market economy, some of the region's countries are considered to be among the most developed ones on the continent, like Ghana and Côte d'Ivoire. With an estimate of 419 Million people in West Africa, a population about the size of the EU will witness great changes in the coming years - on top of the changes already witnessed since 2020, including for example elections in Nigeria in 2023.

In this Special Issue on West Africa, potential research can therefore focus on the state of democracy in one or several of the 16 countries of the region. Also, the dynamics of Coup d'Etats or other political and economic characteristics of the region could be taken into focus. What is more, we expect the deteriorating security situation to play an important role in the upcoming Issue.

We thus invite statistics-based and policy-centered contributions to the regional field of West Africa (Benin, Burkina Faso, Cape Verde, The Gambia, Ghana, Guinea, Guinea-Bissau, Ivory Coast, Liberia, Mali, Maroc, Niger, Nigeria, Senegal, Sierra Leone, and Togo). We especially invite submissions on the following areas and topics:

- Regional focus and comparative perspectives of different countries in West Africa
- Cross-country system comparisons (politics and polity)
- Policy evaluation and impact assessment
- Democracy and autocracy
- Comparative aspects of security policy and transition of power
- Economic policy of infrastructure and development
- Economic and political alliance in the region (ECOWAS); West African Monetary Union (WAMU); Union économique et monétaire ouest-africaine (UEMOA)

We accept the submission of **research notes** (5,000 words max.) and **full articles** (9,000 words) for this special issue.

## **Rewarding outstanding work**

In 2023 and 2024 the Board of Editors will award the Emil J. Gumbel Prize to the author of an outstanding contribution published in Statistics, Politics and Policy.

The reward includes a financial incentive of 500 USD.

**Manuscripts should be submitted until 30<sup>th</sup> of June 2024.**

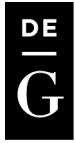

All documents are to be handed in via our official SPP ScholarOne online center:

<http://mc.manuscriptcentral.com/dgspp>

Pre-formatting our publication style is not necessary. Final formatting is required only after acceptance. As a hybrid journal we offer classical and open-access publication options. For author guidelines and further information on Statistics, Politics and Policy visit the website:

<https://www.degruyter.com/journal/key/spp/html>

You may also contact the Managing Editors ([spp@politik.uni-freiburg.de](mailto:spp@politik.uni-freiburg.de)) with questions. Manuscripts will be subject to a double-blind peer-review process. Accepted papers will be published in Statistics, Politics and Policy ahead-of-print in mid 2024.

*Kind regards,*

*Prof. Dr. Uwe Wagschal, Editor-in-Chief ([uwe.wagschal@politik.uni-freiburg.de](mailto:uwe.wagschal@politik.uni-freiburg.de))*

*Judith Reinbold, Managing Editor*

*Ronald Schleeauf, Managing Editor*
